# Supplementary material for: The Oncology Research Information Exchange Network (ORIEN) - Building a Real-World Collaborative, Patient-driven Infrastructure for Discovery Research and Precision Oncology
Source: Research Square preprint supplement (doi:10.21203/rs.3.rs-7077810/v1), 2026-06-02
Supplement: Supplementary file 1 [file 681682ac7730d9514194dbd5.docx]

**SUPPLEMENTAL TABLES**

| Race and Ethnicity | Avatar | TCGA |
| --- | --- | --- |
| American Indian or Alaska Native | 137 (0.42%) | 27 (0.30%) |
| Asian | 695 (2.13%) | 650 (7.26%) |
| Black or African American | 1,688 (5.18%) | 868 (9.69%) |
| Native Hawaiian or Other Pacific Islander | 193 (0.59%) | 12 (0.13%) |
| White | 28,840 (88.58%) | 7,399 (82.62%) |
| Some Other Race | 639 (1.96%) | n/a |
| Unknown/Not Reported Race | 365 (1.12%) | 2,011 (18.34%) |
| Hispanic or Latino | 2,639 (8.11%) | 351 (4.54%) |
| Not Hispanic or Latino | 28,993 (89.05%) | 7,384 (95.46%) |
| Unknown/Not Reported Ethnicity | 925 (2.84%) | 3,232 (29.47%) |
| Total | 32,557 | 10,967 |

**Supplemental Table 1.** Race and Ethnicity across Avatar (v25.05).Here shown as compared to TCGA demographics.

| Model/Covariates | Hazard  Ratio (HR) | P-value |
| --- | --- | --- |
| Univariate Model  Signature summary score | 0.98 | 0.004 |
| Multivariate Model  Signature Summary Score  Age at ICI start  Sex (ref:Male)  Site of Collection (ref:Primary) | 0.98  1.02  0.78  1.15 | 0.007  0.005  0.203  0.496 |

**Supplemental Table 2.** Univariate and multivariate Cox regression modeling of rwPFS in immune-checkpoint-inhibitor-treated melanoma patients. The “Signature summary score” is for the T-cell inflamed gene signature.

**SUPPLEMENTAL FIGURES**
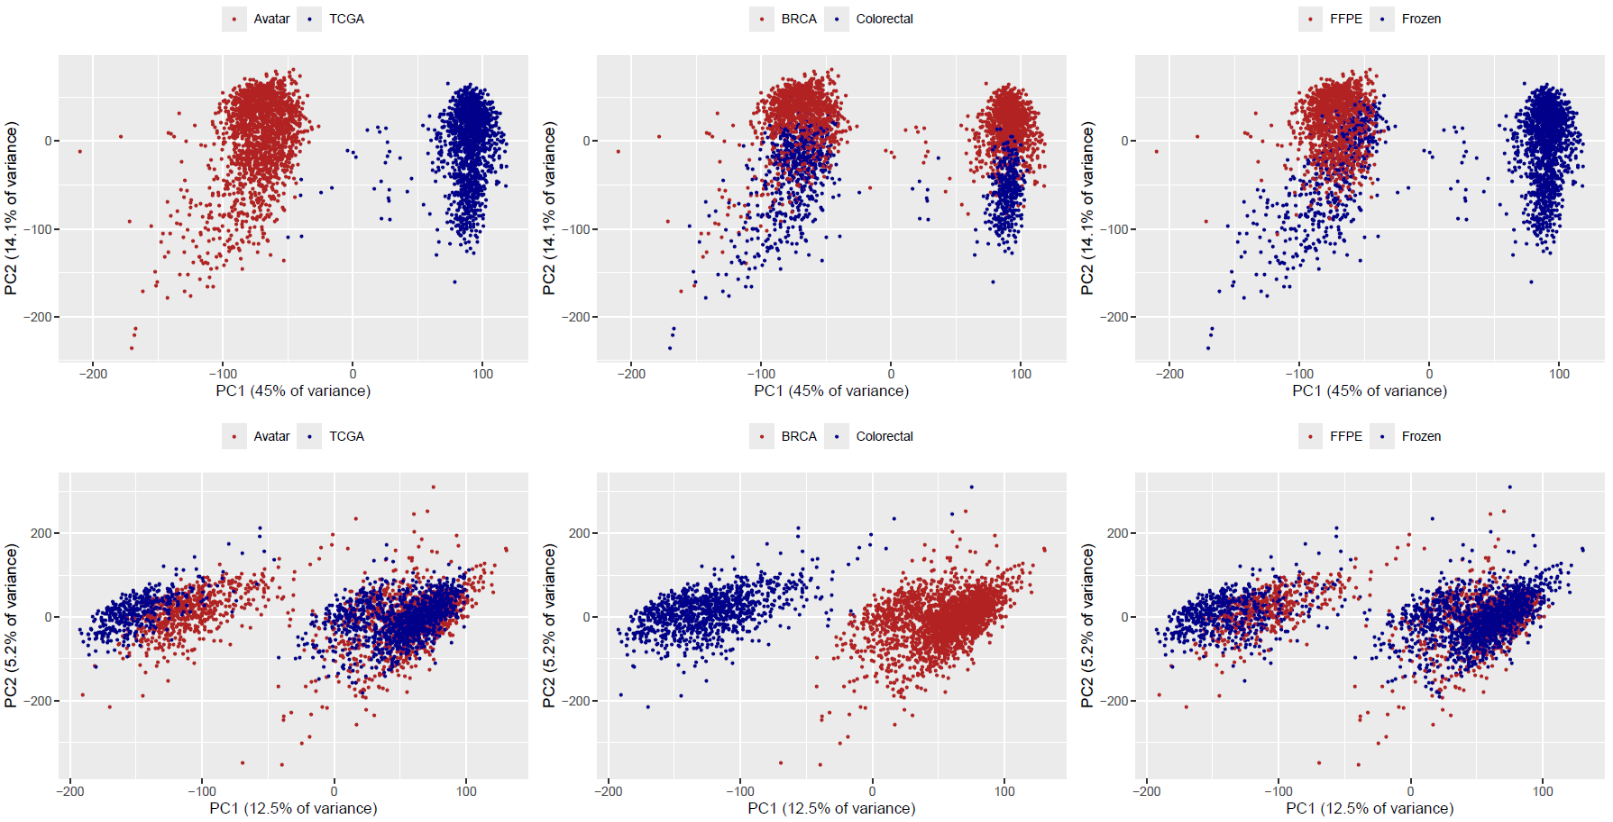

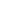


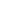


**Supplemental Figure 1.** RNA-seq Normalization. **A.** PCA on Avatar and TCGA unnormalized RNA-seq data for breast and colorectal cancer cohorts. The left panel shows samples colored by data source, the middle panel shows samples colored by disease type, and the right panel shows samples colored by preservation method. **B.** Similar to the panels shown in A, using RNA-seq profiles after ComBat normalization for batch effects induced by data source or preservation method.

**Supplemental Figure 2:**

**
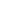
**


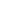


**SUPPLEMENTAL METHODS**

**RNA-sequencing Normalization and Principal Component Analysis**

To address any non-biological effects on RNA-seq data due to preservation method, we utilized the ComBat normalization algorithm from the `sva` R-package [version 3.34] per disease cohort and pan-cancer (with additional loess smoothing) to normalize the preservation method bias. Specifically, ComBat normalization of the Avatar/TCGA data was performed and the top 5,000 most variable protein-coding genes (variance computed on the log2-scale of TPMs across all collated samples) were used to compute principal components analysis (PCA) and tSNE (Rtsne version 0.17) to contrast sample source, disease type, and preservation method.
